# Supplementary material
Source: PubMed Central journal article supplement (PMC2768014)
Supplement: tjp0587-4575-SD1.pdf [file tjp0587-4575-SD1.pdf]

## SUPPLEMENTAL FIGURE

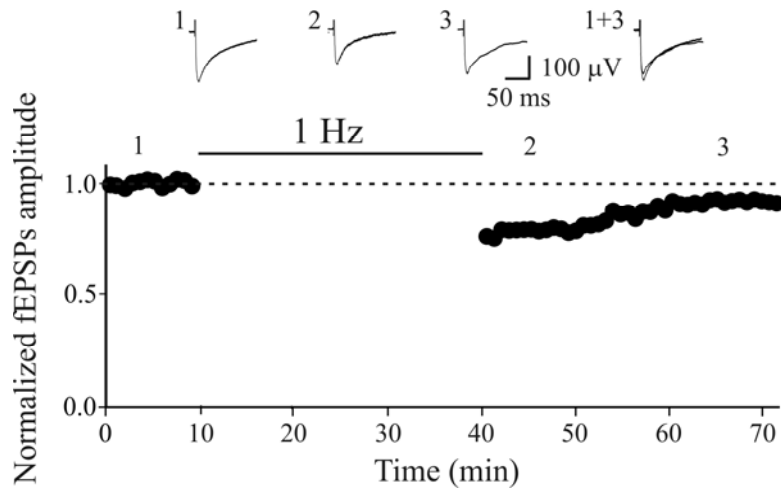

**Figure S1.** A longer induction paradigm can at least partially rescue LTD in CEF-treated rats. The graph represents summary data from six slices (from different animals). LFS of granule cells in the dentate gyrus (30 min at 1 Hz, bar) induced a transient depression of fEPSPs that slowly stabilized to a steady state level. Note that 30 min after LFS the relative amplitude of fEPSP was  $0.91 \pm 0.0027$  (error bars are within the symbols). This value was significantly different from controls ( $P= 0.005$ ). The fEPSPs amplitude was normalized to the baseline level obtained before LFS. Insets above the graph refer to fEPSPs obtained in one experiments at the points shown on the graph.
