# Supplementary material
Source: PubMed Central journal article supplement (PMC2768014)
Supplement: tjp0587-4575-SD2.pdf [file tjp0587-4575-SD2.pdf]

**Table S1.** Density of GLT-1a gold particles in control and ceftriaxone-treated rats

| <b>Localization</b>               | <b>Controls</b> (particles/ $\mu\text{m}^2$ ) | <b>CEF</b> (particles/ $\mu\text{m}^2$ ) | <b>Controls vs CEF</b> |
|-----------------------------------|-----------------------------------------------|------------------------------------------|------------------------|
| Nucleus (background) <sup>o</sup> | 0.6 $\pm$ 0.05 (n=12)                         | 0.7 $\pm$ 0.02 (n=14)                    |                        |
| MF terminals*                     | 6.9 $\pm$ 0.96 (n=19)                         | 9.7 $\pm$ 0.89 (n=20)                    | <i>P</i> =0.04         |
| Plasma membrane <sup>s</sup>      | 22.2 $\pm$ 3.27                               | 40.8 $\pm$ 7.30                          | <i>P</i> =0.026        |
| Cytoplasm                         | 6.2 $\pm$ 0.82                                | 10.8 $\pm$ 1.55                          | <i>P</i> =0.014        |
| Astrocytic processes <sup>+</sup> | 23.0 $\pm$ 3.68 (n=38)                        | 54.0 $\pm$ 9.39 (n=37)                   | <i>P</i> =0.005        |
| Plasma membrane <sup>s</sup>      | 65.0 $\pm$ 8.10                               | 105.2 $\pm$ 15.44                        | <i>P</i> =0.022        |
| Cytoplasm                         | 10.7 $\pm$ 1.39                               | 24.7 $\pm$ 6.59                          | <i>P</i> =0.038        |

Density values are mean  $\pm$  SEM; n=number of profiles. Statistical analysis performed using two sided t-test. <sup>o</sup>In control and CEF-treated rats, the density of gold particles in MF terminals and astrocytic profiles was significantly higher than background (*P*<0.0001). <sup>\*</sup>In MF terminals of both control and treated rats, the density of membrane-associated particles was significantly higher than that of cytoplasmic particles (controls: *P*<0.0001; CEF: *P*=0.0003). <sup>+</sup>In astrocytic processes of both control and treated rats, the density of membrane-associated particles was significantly higher than that of cytoplasmic particles (*P*<0.0001). <sup>s</sup>In both control and treated rats, the density of astrocytic membrane-associated particles was significantly higher than that of MF terminals membrane-associated particles (controls: *P*=0.0006; CEF: *P*=0.005).
