# Supplementary material
Source: PubMed Central journal article supplement (PMC2768014)
Supplement: tjp0587-4575-SD3.pdf [file tjp0587-4575-SD3.pdf]

**Table S2.** Density of GLT-1a gold particles in control and ceftriaxone-treated WT (GLT-1+/+) and GLT-1 KO (GLT-1 -/-) mice

| <b>Localization</b>     | <b>GLT-1 +/+</b><br>(particles/ $\mu\text{m}^2$ ) | <b>GLT-1 +/+ CEF</b><br>(particles/ $\mu\text{m}^2$ ) | <b>GLT-1 -/-</b><br>(particles/ $\mu\text{m}^2$ ) | <b>GLT-1 -/- CEF</b><br>(particles/ $\mu\text{m}^2$ ) |
|-------------------------|---------------------------------------------------|-------------------------------------------------------|---------------------------------------------------|-------------------------------------------------------|
| Nucleus<br>(background) | 0.5 $\pm$ 0.07<br>(n=10)                          | 0.5 $\pm$ 0.08<br>(n=10)                              | 0.4 $\pm$ 0.04<br>(n=10)                          | 0.4 $\pm$ 0.02<br>(n=10)                              |
| MF terminals            | 4.5 $\pm$ 0.8<br>(n=12)                           | 7.9 $\pm$ 1.3<br>(n=12)                               | 0.4 $\pm$ 0.05<br>(n=12)                          | 0.3 $\pm$ 0.07<br>(n=12)                              |

Density values are mean  $\pm$  SEM; n=number of profiles. Statistical analysis was performed using two sided t-test. In both treated and untreated WT mice, the density of gold particles in MF terminals was significantly higher ( $P < 0.0001$ ) than background, calculated by estimating labeling density over cell nuclei. Conversely, in both treated and untreated GLT-1 KO mice, the density of gold particles in MF terminals was comparable to background.
